# Supplementary material for: Synthesis of alumina supported Pd–Cu alloy nanoparticles for CO oxidation via a fast and facile method
Source: Royal Society of Chemistry journal article supplement (doi:10.1039/c5ra13813b), 2015-01-01
Supplement: c5ra13813b1.pdf [file c5ra13813b1.pdf]

## Supporting Information

# Synthesis of alumina supported Pd-Cu alloy nanoparticles for CO oxidation via a fast and facile method<sup>†</sup>

Lanbo Di,<sup>\*a</sup> Weijie Xu,<sup>a</sup> Zhibin Zhan<sup>a</sup> and Xiuling Zhang<sup>\*a,b</sup>

<sup>a</sup>College of Physical Science and Technology, Dalian University, Dalian 116622 (P.R. China). E-mail: dilanbo@163.com; xiulz@sina.com; Fax: + 86-411-87402712; Tel: + 86-411-87402712

<sup>b</sup> Key Laboratory for Non-traditional & Functional Materials Preparation of Education Department of Liaoning Province, Dalian University, Dalian 116622 (P.R. China)

## 1. Experimental section

### 1.1 Catalyst preparation

A solution of Pd(NO<sub>3</sub>)<sub>2</sub> (AR, Tianjin Kemiou Chemical Reagent Co., Ltd.) was prepared by adding a certain amount of Pd(NO<sub>3</sub>)<sub>2</sub> into HNO<sub>3</sub> aqueous solution under stirring until complete dissolution. Then Cu(NO<sub>3</sub>)<sub>2</sub> (AR, Tianjin Kemiou Chemical Reagent Co., Ltd.) was dissolved in the Pd(NO<sub>3</sub>)<sub>2</sub> solution.  $\gamma$ -Al<sub>2</sub>O<sub>3</sub> pellets (40-60 mesh,  $S_{\text{BET}}=267.2 \text{ m}^2\cdot\text{g}^{-1}$ ) was pretreated at 600 °C for 5 h to be investigated.

Pd/Al<sub>2</sub>O<sub>3</sub>-C sample was prepared by simple incipient wetness impregnation followed by thermal reduction at 300 °C in H<sub>2</sub> for 2 h using Pd(NO<sub>3</sub>)<sub>2</sub> as Pd precursor. Pd-Cu/Al<sub>2</sub>O<sub>3</sub>-P catalyst was fabricated by simple incipient wetness impregnation followed by the process of 6-min atmospheric-pressure cold plasma reduction using Pd(NO<sub>3</sub>)<sub>2</sub> and Cu(NO<sub>3</sub>)<sub>2</sub> as Pd and Cu precursors, respectively. As a comparison, Pd-Cu/Al<sub>2</sub>O<sub>3</sub>-C sample was also prepared by thermal reduction at 300 °C in H<sub>2</sub> for 2 h rather than plasma reduction. Both of the nominal Pd and Cu loading amounts were 1.3wt% in this study.

The schematic diagram of the atmospheric-pressure DBD cold plasma device for preparing Pd/Al<sub>2</sub>O<sub>3</sub> and Pd-Cu/Al<sub>2</sub>O<sub>3</sub> catalysts had been described previously.<sup>1</sup> A mixture of Ar (>99.999%) and H<sub>2</sub> (>99.999%) with a total flow rate of 100 ml·min<sup>-1</sup> was used as the working gas. In the gas mixture, H<sub>2</sub> content was 50%. Before the cold plasma treatment, 0.3 g sample was uniformly put in the reaction tank. The plasma treatment was conducted by applying a 36 kV sine-wave high voltage at a frequency of 14.1 kHz for 6 min.

## 1.2 Catalyst characterization

The samples were characterized by powder X-ray diffraction (XRD) on a Dandong Haoyuan DX-2700 X-ray diffractometer at 40 kV and 30 mA for graphite-monochromatized Cu K<sub>α1</sub> radiation ( $\lambda=1.54178 \text{ \AA}$ ). The chemical compositions of the samples were investigated by X-ray photoelectron spectroscopy (XPS, ESCALAN250 Thermo VG) using a monochromatized Al K<sub>α</sub> (1486.6 eV) X-ray source. All binding energies were referenced to the XPS peak of carbon 1s at 284.6 eV. Temperature programmed reduction (TPR) experiments were carried out with Micromeritics AutoChem II 2920 Automated Catalyst Characterization System using a 30 ml·min<sup>-1</sup> flow of H<sub>2</sub>/Ar mixture (10%H<sub>2</sub>). 100 mg catalyst was used. Before each experiment, the catalyst was pretreated at 600 °C in Ar gas flow for 0.5 h, then cooled to 50 °C. Subsequently, the Ar gas flow was switched to the H<sub>2</sub>/Ar mixture, and the reduction was performed from 50 to 800 °C at a constant rate of 10 °C·min<sup>-1</sup>. The rate of H<sub>2</sub> gas consumption was monitored by a thermal conductivity detector (TCD). Pore size distributions, BET surface areas and pore volumes were measured by nitrogen adsorption/desorption using a NOVA 2200e gas sorption analyzer (Quantachrome Corp.). Prior to the adsorption analysis, the samples were outgased at 200 °C for 5 h in the degas port of the adsorption analyzer. The sorption data were analyzed using the Barrett-Joyner-Halenda (BJH) model with Halsey equation. The samples were observed by high resolution transmission electron microscopy (HRTEM, Tecnai G<sup>2</sup> F20, Philips) at 200 kV accelerating voltage.

## 1.3 Activity test

The temperature-dependent CO oxidation was performed in a quartz tube (4 mm i.d., 6.0 mm o.d.) at atmospheric pressure with 10 mg catalyst. The reaction was started in flowing CO/O<sub>2</sub> mixture (1.0 vol.% CO, 20.0 vol.%O<sub>2</sub>, balance N<sub>2</sub>) with a 20 ml·min<sup>-1</sup> flow rate over the temperature range of 20-200 °C. All data were acquired after 30 min reaction time to allow the attainment of steady state. The effluent was then analyzed online by a gas chromatograph (Tianmei 7890) equipped with a TDX-01 column and a thermal conductivity detector (TCD).

The turnover frequency (TOF) was defined as the number of CO converted over one surface-active Pd atom per second:<sup>2</sup>

$$TOF(s^{-1}) = \frac{M_{CO} \cdot X}{M_{Pd} \cdot D \cdot t}$$

where  $M_{CO}$  and  $M_{Pd}$  were the amount of CO and Pd in the feed (mol), respectively,  $X$  was the conversion of CO,  $D$  was the Pd dispersion estimated from the TEM mean particle diameters, assuming spherical particles,<sup>3</sup>  $t$  was the reaction time (s).

## 2. Characterization and activity test of the samples

### 2.1 XRD

The crystallite sizes of Pd and Pd-Cu nanoparticles were also calculated by Scherrer's formula from the half-maximum peak-width values of the (111) reflections of XRD patterns. They are ca. 9.3 nm, 6.5 nm and 5.9 nm for Pd/Al<sub>2</sub>O<sub>3</sub>-C, Pd-Cu/Al<sub>2</sub>O<sub>3</sub>-C, and Pd-Cu/Al<sub>2</sub>O<sub>3</sub>-P, respectively, which are consistent with the results of TEM.

### 2.2 BET

Fig. S1 shows the N<sub>2</sub> adsorption-desorption isotherms and pore size distributions of the samples, and the specific surface area ( $S_{BET}$ ), pore volume and pore diameter of the samples are summarized in Table S1. As shown in Fig. S1a, all of the samples showed an adsorption isotherm of type IV according to the IUPAC classification and had a H3 hysteresis loop that was representative capillary condensation of nitrogen within the non-uniform mesoporous structure, which was consistent with the pore size distribution of the samples (Fig. S1b). Compared with the bare Al<sub>2</sub>O<sub>3</sub> support, the BET surface areas of the Pd/Al<sub>2</sub>O<sub>3</sub> and Pd-Cu/Al<sub>2</sub>O<sub>3</sub> samples were decreased after supporting Pd nanoparticles. Furthermore, the BET surface areas of Pd-Cu/Al<sub>2</sub>O<sub>3</sub> samples are higher than that of Pd/Al<sub>2</sub>O<sub>3</sub>-C, which indicates that Pd-Cu nanoparticles were well dispersed. However, there is not much difference for the BET surface areas and the pore size distribution of the Pd-Cu/Al<sub>2</sub>O<sub>3</sub> samples due to the low loading amount of Pd (1.3wt%). This also indicated that the pores in the Al<sub>2</sub>O<sub>3</sub> support were not destroyed by cold plasma or thermal reduction, which is in line with previous results.<sup>4</sup>

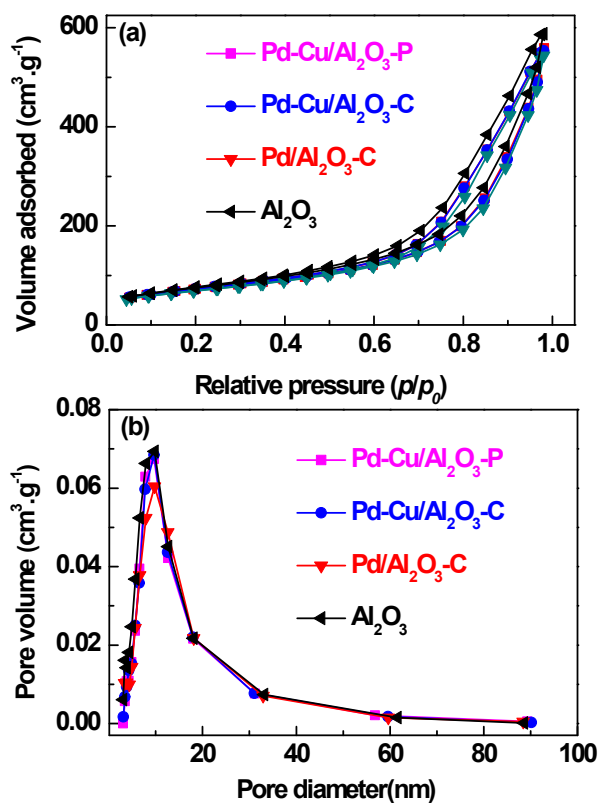

Fig. S1 (a) N<sub>2</sub> sorption isotherms and (b) pore size distributions of the samples.

Table S1 The specific surface area ( $S_{\text{BET}}$ ), pore volume and pore diameter of the samples

| Sample                                  | $S_{\text{BET}}$ (m <sup>2</sup> .g <sup>-1</sup> ) | Pore volume (cm <sup>3</sup> .g <sup>-1</sup> ) | Pore diameter (nm) |
|-----------------------------------------|-----------------------------------------------------|-------------------------------------------------|--------------------|
| Al <sub>2</sub> O <sub>3</sub>          | 267.2                                               | 0.922                                           | 9.76               |
| Pd/Al <sub>2</sub> O <sub>3</sub> -C    | 242.2                                               | 0.847                                           | 9.75               |
| Pd-Cu/Al <sub>2</sub> O <sub>3</sub> -P | 252.7                                               | 0.868                                           | 9.68               |
| Pd-Cu/Al <sub>2</sub> O <sub>3</sub> -C | 252.8                                               | 0.859                                           | 9.63               |

### 2.3 Activity

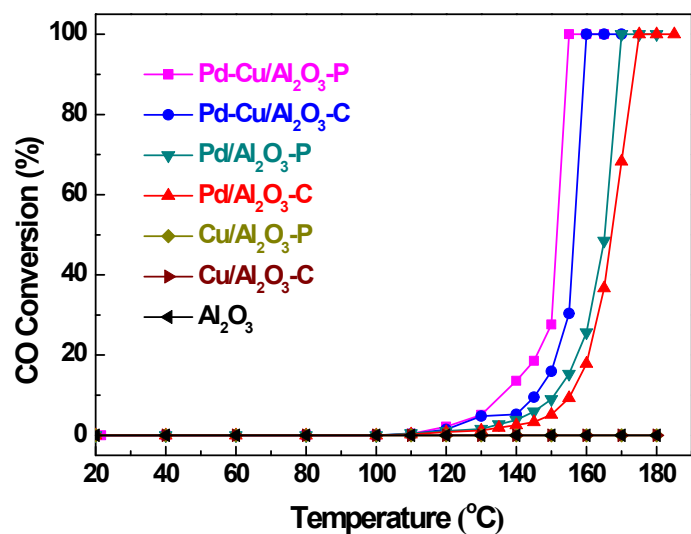

Fig. S2 CO oxidation activity over alumina supported Pd, Cu and bimetallic Pd-Cu catalysts prepared by different methods

As shown in Fig. S2, bare alumina and Cu/Al<sub>2</sub>O<sub>3</sub> exhibited no CO oxidation activity below 180 °C.

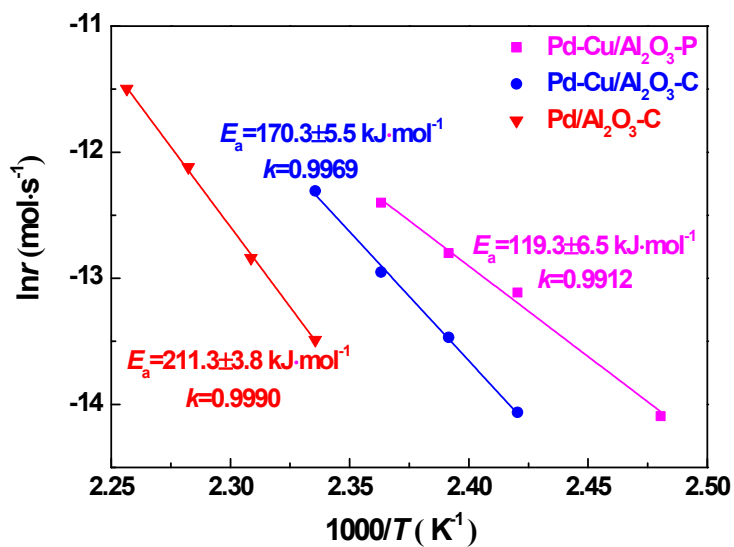

Fig. S3 The corresponding Arrhenius plots of the samples.

Reference

- 1 L. B. Di, Z. J. Xu, K. Wang, X. L. Zhang, *Catal. Today*, 2013, **211**, 109-113
- 2 B. Qi, L. B. Di, W. J. Xu, X. L. Zhang. *J. Mater. Chem. A*, 2014, **2**, 11885-11890
- 3 C. Mohr, H. Hofmeister, P. Claus, *J. Catal.*, 2003, **213**, 86.
- 4 W. J. Xu, Z. B. Zhan, L. B. Di, X. L. Zhang, *Catal. Today*, 2015, DOI:  
10.1016/j.cattod.2015.01.017
